# Supplementary material for: Cationic amino acid-engineered peptide hydrogels for sustained and potent antigen delivery enabling single-administration vaccination
Source: Royal Society of Chemistry journal article supplement (doi:10.1039/d5nr03790e), 2025-01-01
Supplement: d5nr03790e1.pdf [file d5nr03790e1.pdf]

## Supporting Information

### **Cationic Amino Acid-Engineered Peptide Hydrogels for Sustained and Potent Antigen Delivery Enabling Single-Administration Vaccination**

Jingjing Zhou<sup>a</sup>, Jiayi Yu<sup>a</sup>, Shengying Zhang<sup>a</sup>, Zhidong Teng<sup>a</sup>, Haoyue Zang<sup>a</sup>,  
Mingyang Zhang<sup>a</sup>, Shiqi Sun<sup>a\*</sup>, Huichen Guo<sup>a\*</sup>

a. State Key Laboratory for Animal Disease Control and Prevention, College of  
Veterinary Medicine, Lanzhou University, Lanzhou Veterinary Research Institute,  
Chinese Academy of Agricultural Sciences, Lanzhou, China.

\*Corresponding authors:

E-mail addresses: [sunshiqi@caas.cn](mailto:sunshiqi@caas.cn) (S. Sun); [guohuichen@caas.cn](mailto:guohuichen@caas.cn) (H. Guo);

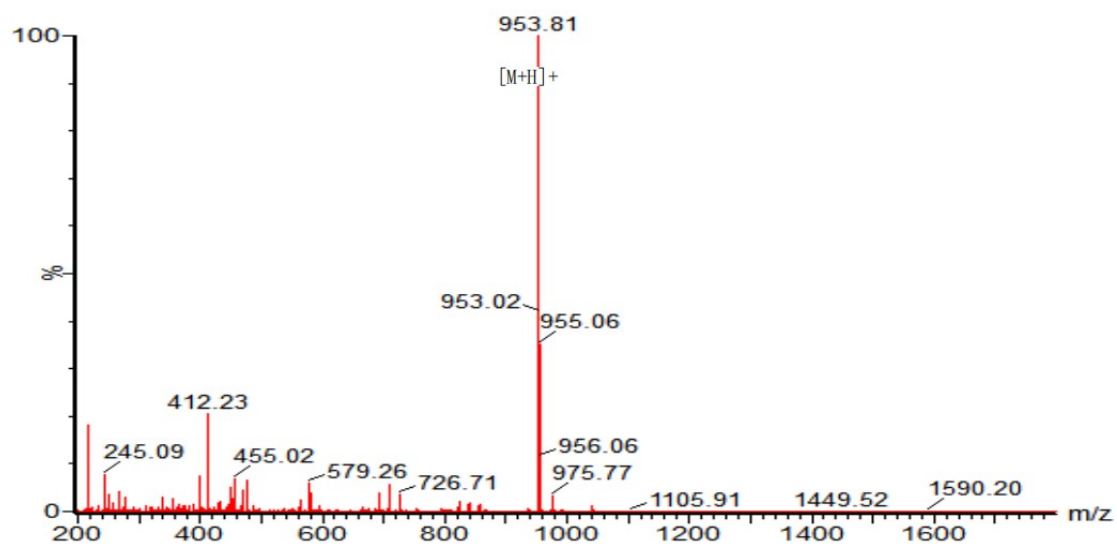

Fig. S1. MS spectrum of J-1. The dominant peak shown in the spectrum corresponds to the single charged ion peak of J-1.

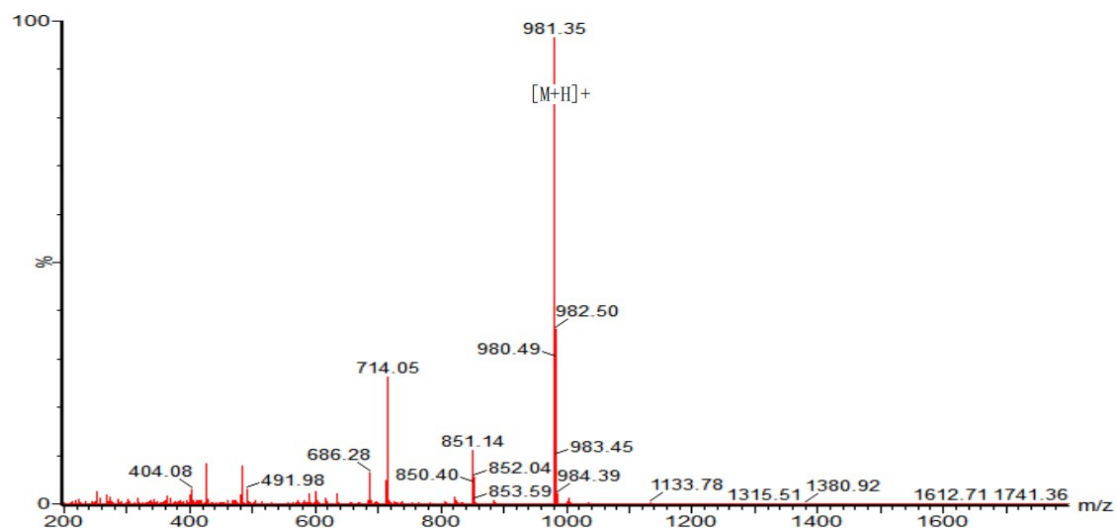

Fig. S2. MS spectrum of J-2. The dominant peak shown in the spectrum corresponds to the single charged ion peak of J-2.

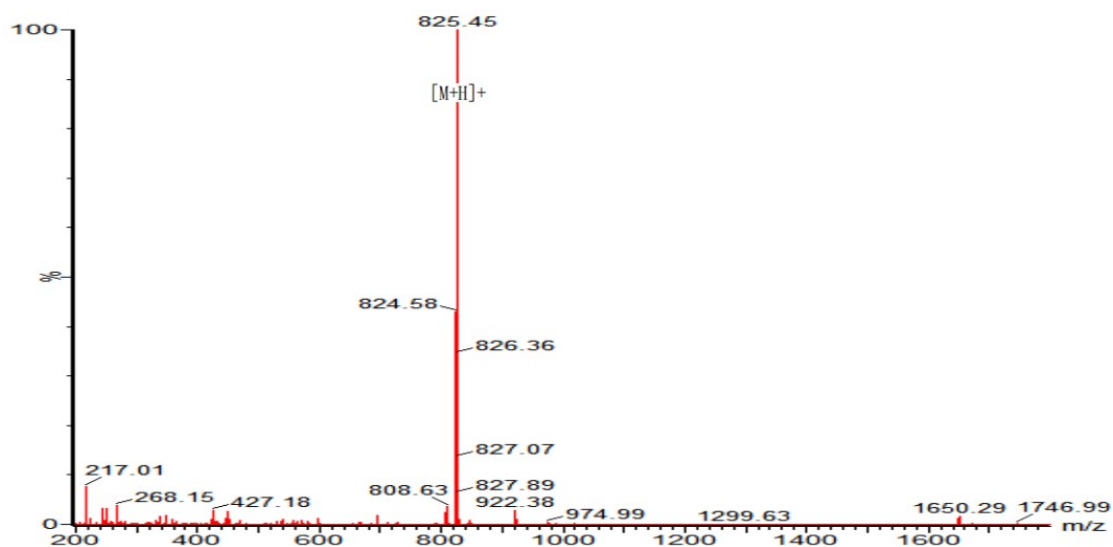

Fig. S3. MS spectrum of J-3. The dominant peak shown in the spectrum corresponds to the single charged ion peak of J-3.

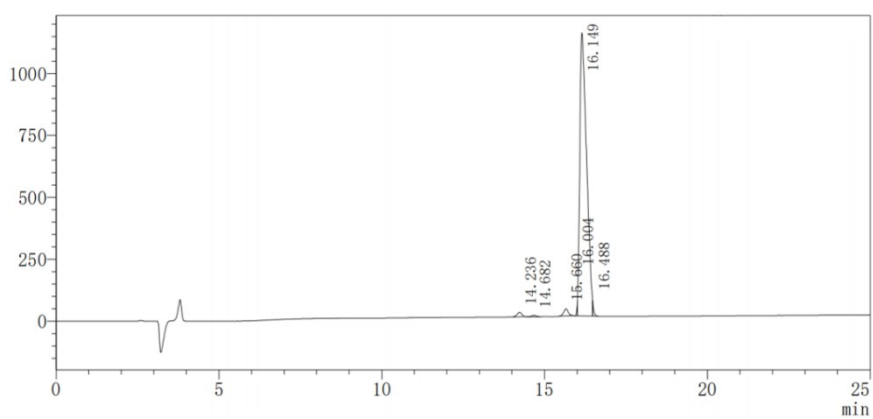

|   | Retention time | Area     | % Area | Peak height |
|---|----------------|----------|--------|-------------|
| 1 | 14.236         | 180208   | 1.045  | 18145       |
| 2 | 14.682         | 53665    | 0.311  | 5845        |
| 3 | 15.660         | 282927   | 1.641  | 28669       |
| 4 | 16.004         | 78092    | 0.453  | 39686       |
| 5 | 16.149         | 16532052 | 95.884 | 1141474     |
| 6 | 16.488         | 114832   | 0.666  | 51377       |

Fig. S4. HPLC spectrum of J-1. The percentage of the area of the main peak of J-1 at 16.149 min accounts for 95.884 % of the total peak area, which represents the purity of J-1.

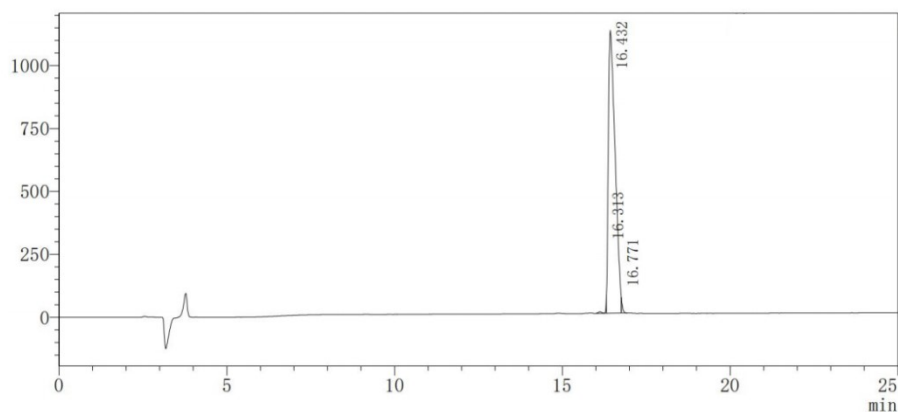

|   | Retention time | Area     | % Area | Peak height |
|---|----------------|----------|--------|-------------|
| 1 | 16.313         | 123354   | 0.769  | 40934       |
| 2 | 16.432         | 15808465 | 98.515 | 1121250     |
| 3 | 16.771         | 114919   | 0.716  | 51318       |

Fig. S5. HPLC spectrum of J-2. The percentage of the area of the main peak of J-2 at 16.432 min accounts for 98.515 % of the total peak area, which represents the purity of J-2.

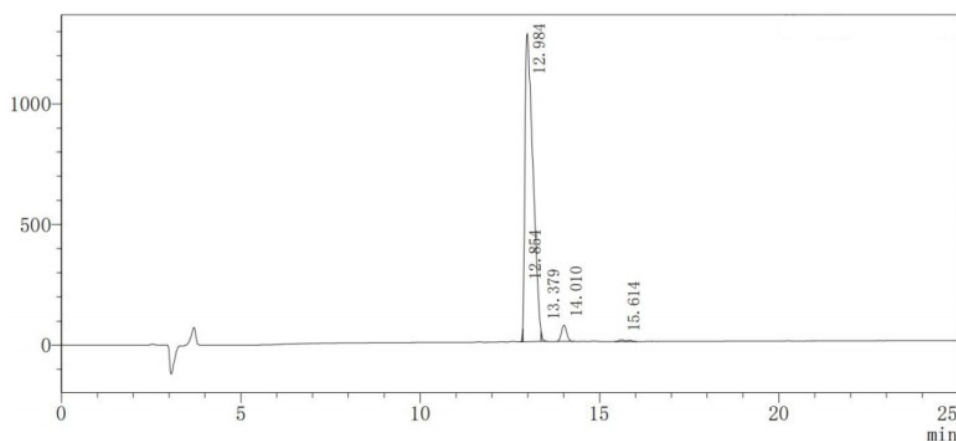

|   | Retention time | Area     | % Area | Peak height |
|---|----------------|----------|--------|-------------|
| 1 | 12.854         | 57572    | 0.277  | 29886       |
| 2 | 12.984         | 19841874 | 95.497 | 1276474     |
| 3 | 13.379         | 86384    | 0.416  | 37434       |
| 4 | 14.010         | 682248   | 3.284  | 67234       |
| 5 | 15.614         | 109391   | 0.526  | 6929        |

Fig. S6. HPLC spectrum of J-3. The percentage of the area of the main peak of J-3 at 12.984 min accounts for 95.497 % of the total peak area, which represents the purity of J-3.

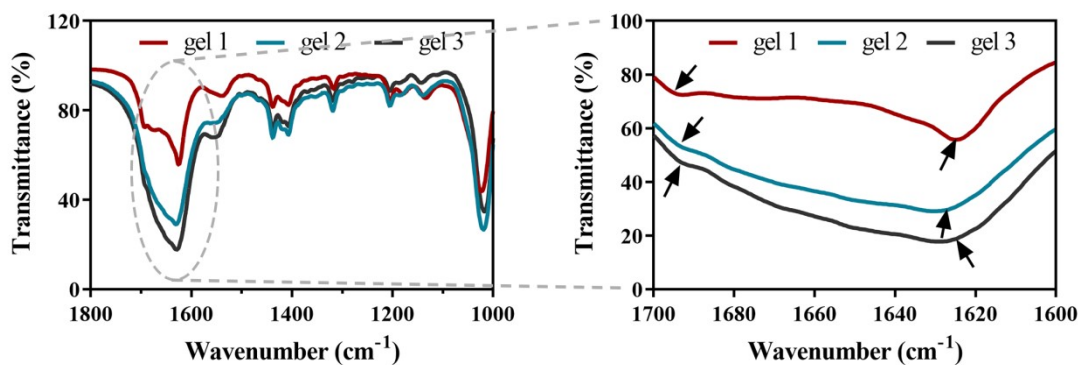

Fig. S7. The FTIR spectra of gel 1, gel 2, and gel 3.

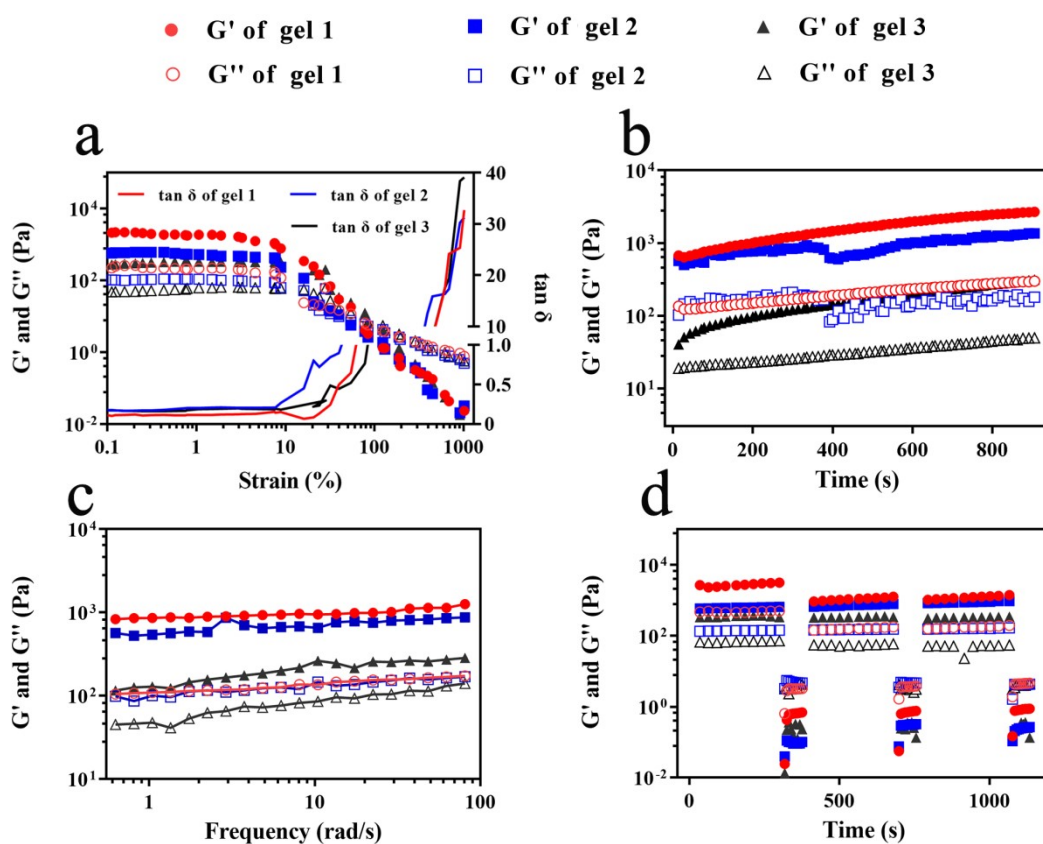

Fig. S8. Rheological characterization of gel 1, gel 2, and gel 3. (a) Strain sweep from 0.1% to 1000% at 1 Hz. (b) Time sweep at 1% strain and 1 Hz for 15 min. (c) Frequency sweep from 0.1 to 100 rad/s at 1% strain. (d) Step-strain test: alternating 1% strain (300 s) and 100% strain (60 s), repeated for three cycles.

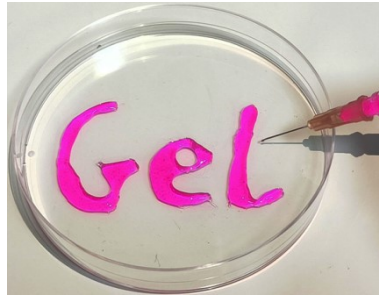

Fig. S9. Photograph of “Gel” extruded Gel 1 through syringe needle.

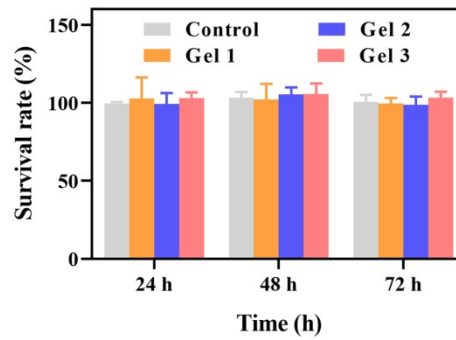

Fig. S10. Cell viability of Marc 145 cells after co-incubation with Gel 1, Gel 2, or Gel 3, determined by MTS assay; tissue culture plate (TCP) served as the control.

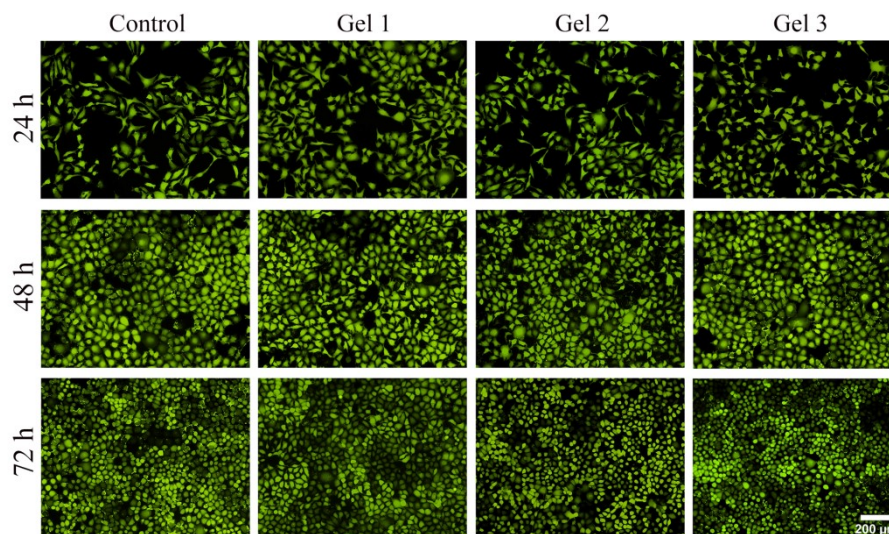

Fig. S11. Live/dead staining of Marc 145 cells after co-incubation with Gel 1, Gel 2, or Gel 3; TCP served as the control. Scale bar, 200  $\mu\text{m}$ .

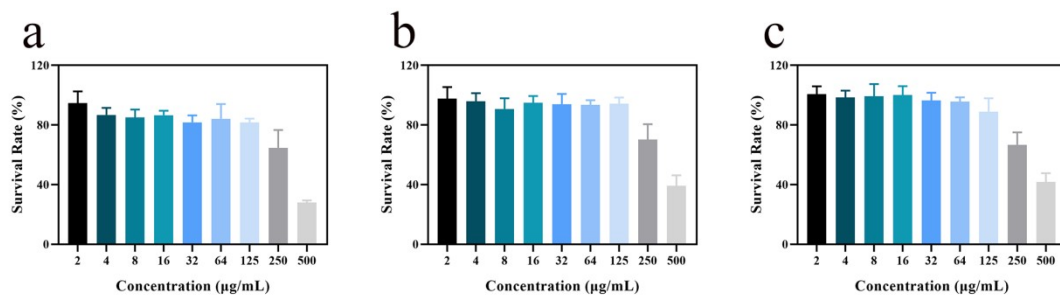

Fig. S12. The survival rate of Marc 145 cells after incubation with J-1 (a), J-2 (b), and J-3 (c) at different concentration for 24 h, TCP was used as control.

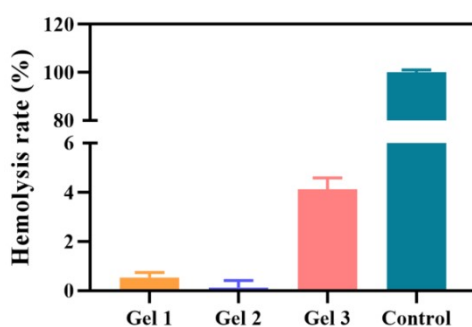

Fig. S13. Hemolysis rate of mouse red blood cells co-incubated with Gel 1, Gel 2, or Gel 3; 1% Triton X-100 served as control.

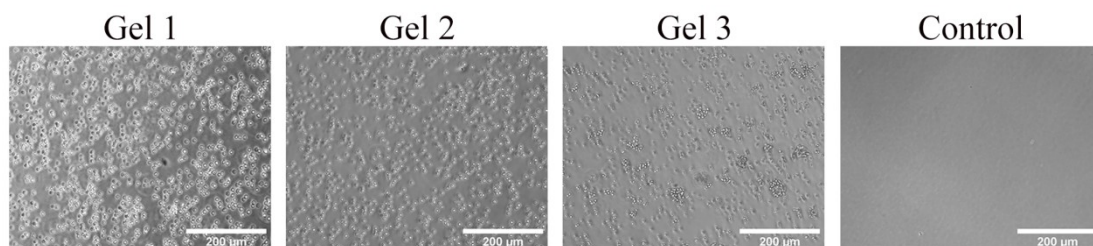

Fig. S14. Erythrocyte morphology after treatment with Gel 1, Gel 2, and Gel 3, 1% Triton X-100 was used as control.

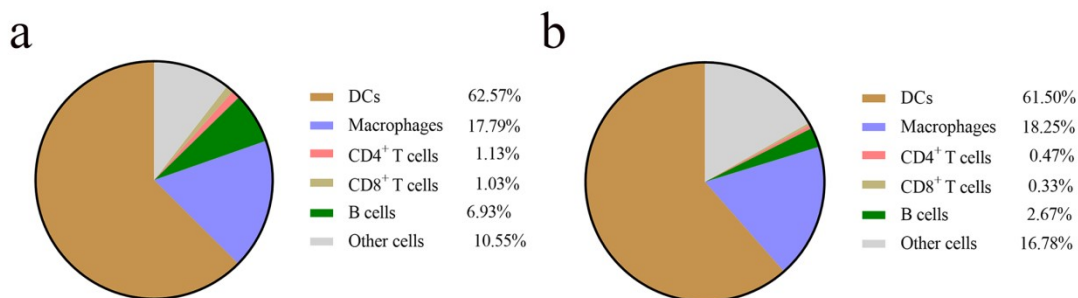

Fig. S15. (a-b) Frequency of DCs, macrophages, CD4<sup>+</sup> T cells, CD8<sup>+</sup> T cells, B cells, and other

cells from retrieved nodules of Gel 2 (a) and Gel 3 (b).
